# Supplementary material for: DFT and TD-DFT studies on the electronic and optical properties of explosive molecules adsorbed on boron nitride and graphene nano flakes
Source: Royal Society of Chemistry journal article supplement (doi:10.1039/c4ra11314d), 2014-12-09
Supplement: c4ra11314d1.pdf [file c4ra11314d1.pdf]

Supporting Information

for

# DFT and TD-DFT Studies on the Electronic and Optical Properties of Explosive Molecules Adsorbed on Boron Nitride and Graphene Nano Flakes

*Hakkim Vovusha,<sup>1, 2</sup> and Biplab Sanyal<sup>1\*</sup>*

<sup>1</sup>Department of Physics and Astronomy, Uppsala University, Box-516, 751 20, Uppsala, Sweden

<sup>2</sup>Department of Cell and Molecular Biology, Uppsala University, Box-596, BMC, 751 24, Uppsala, Sweden

\* Correspondence to: [biplab.sanyal@physics.uu.se](mailto:biplab.sanyal@physics.uu.se)

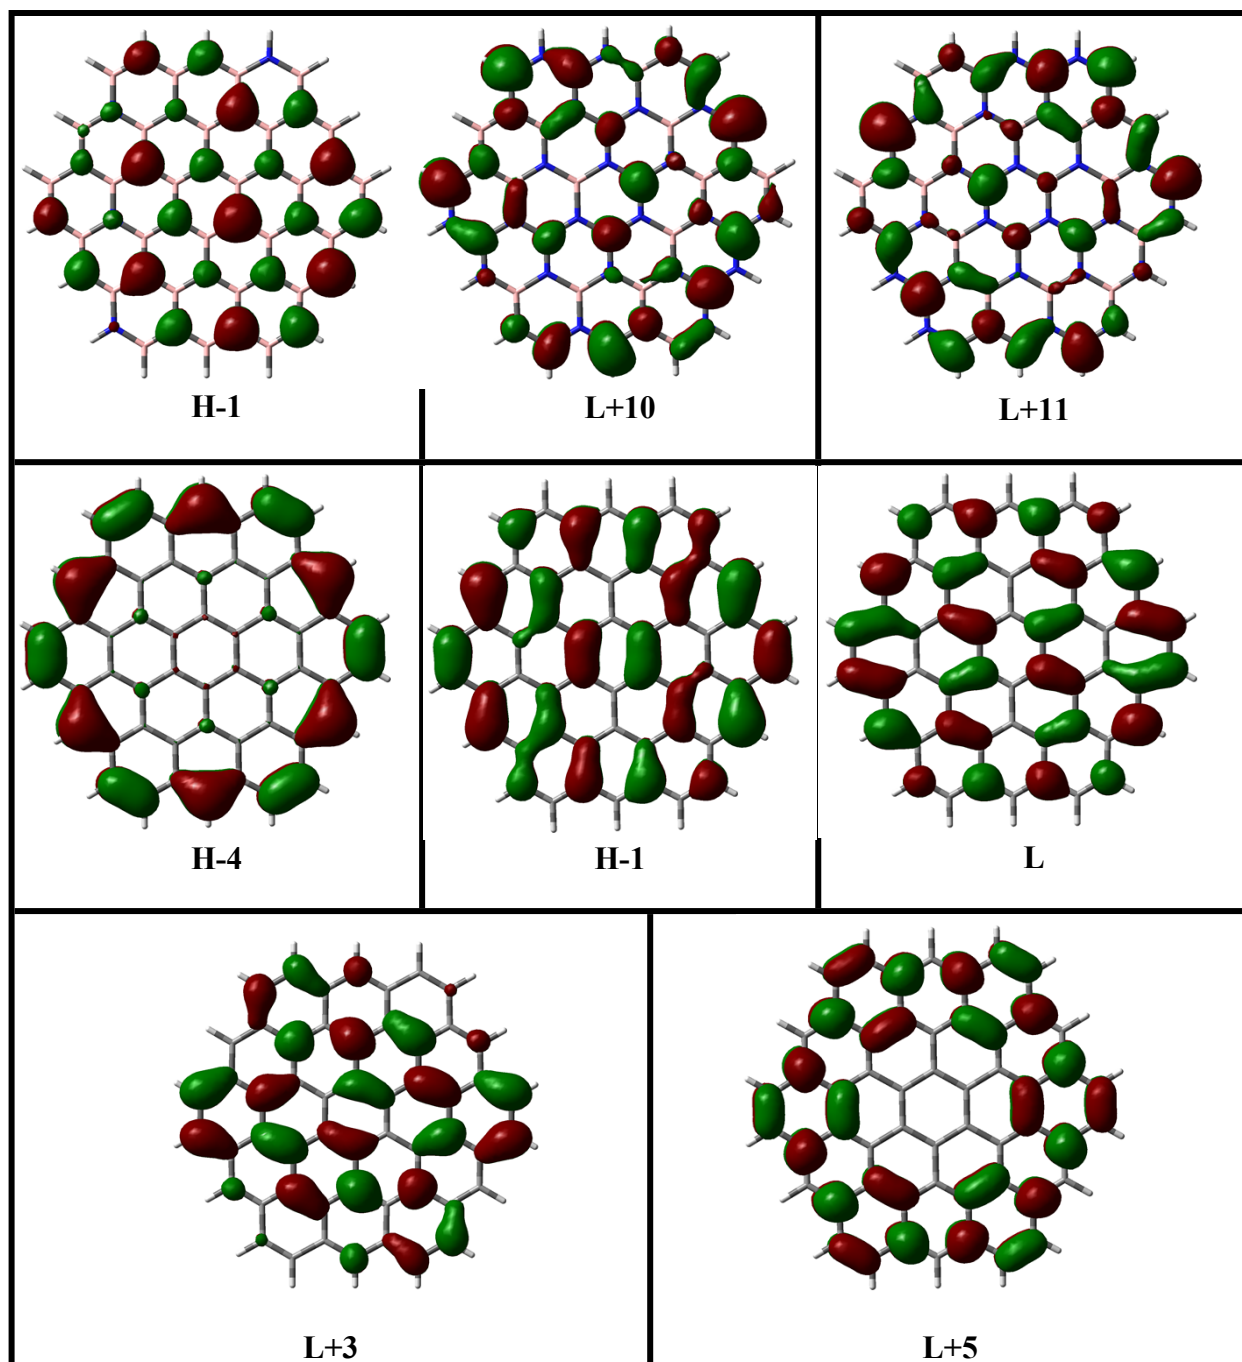

**Figure S1.** Frontier molecular orbitals involved in the vertical excitation of BN and G flake.

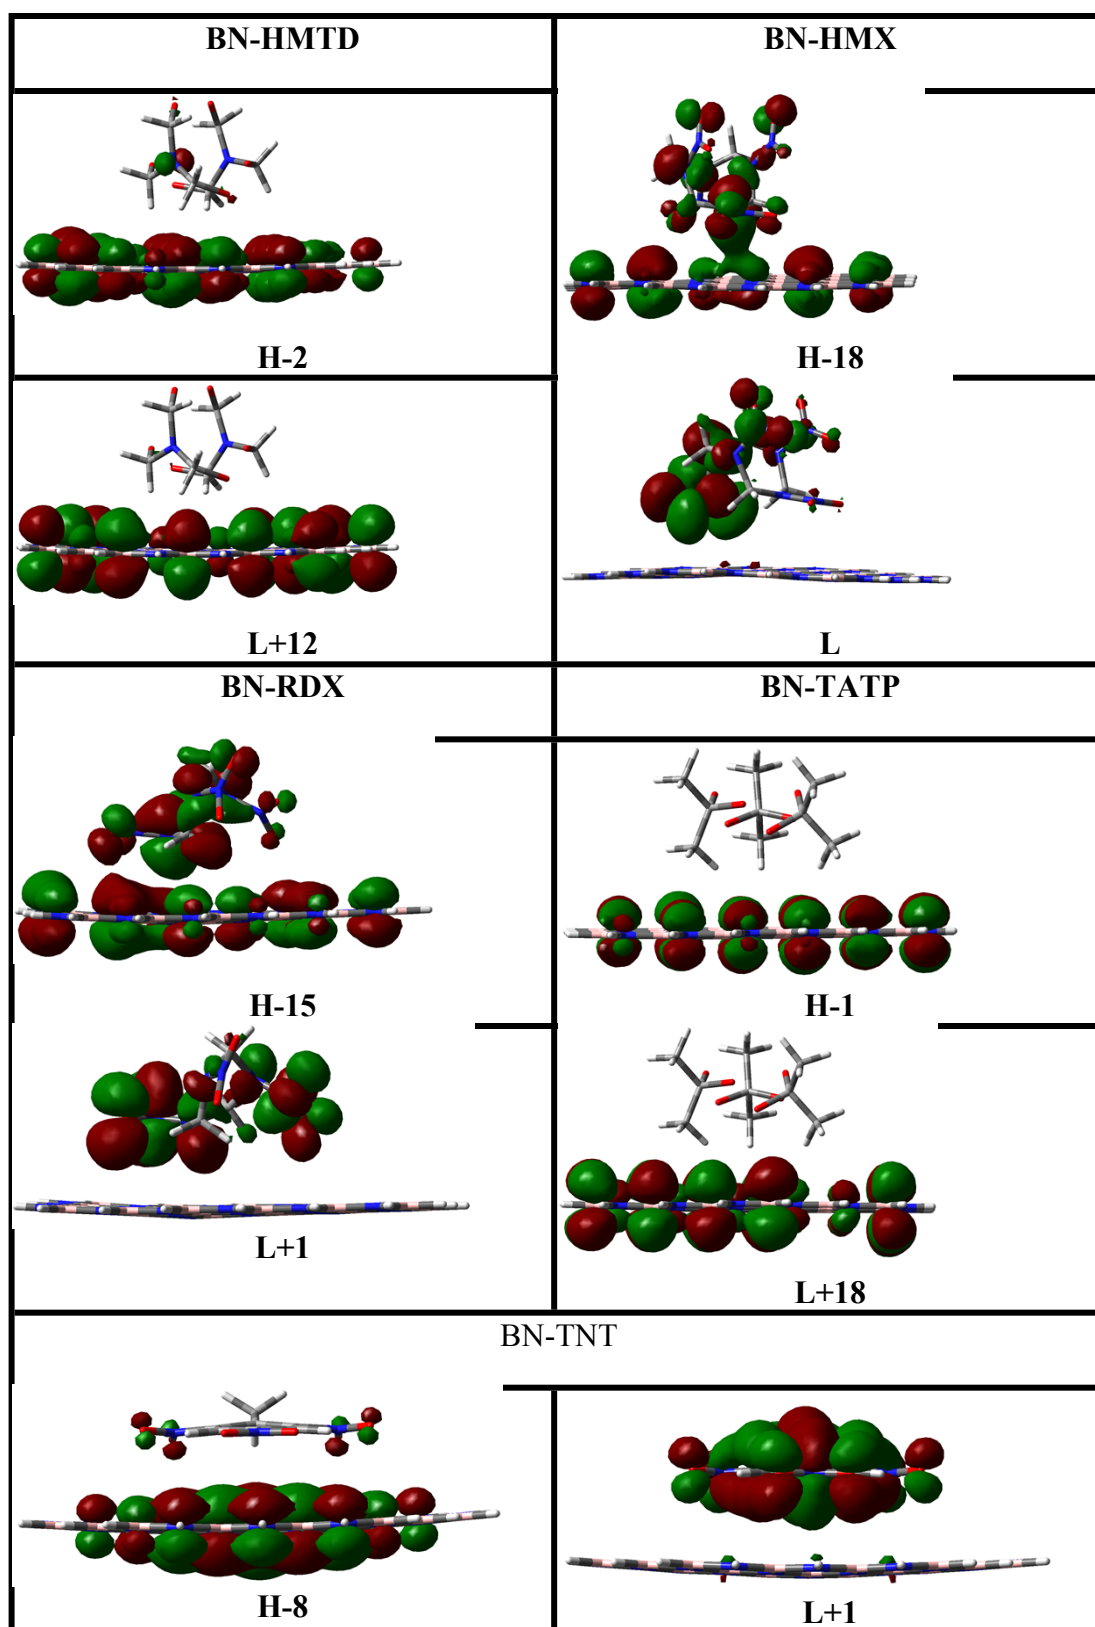

**Figure S2.** Frontier molecular orbitals involved in the vertical excitation of BN-explosive complexes.

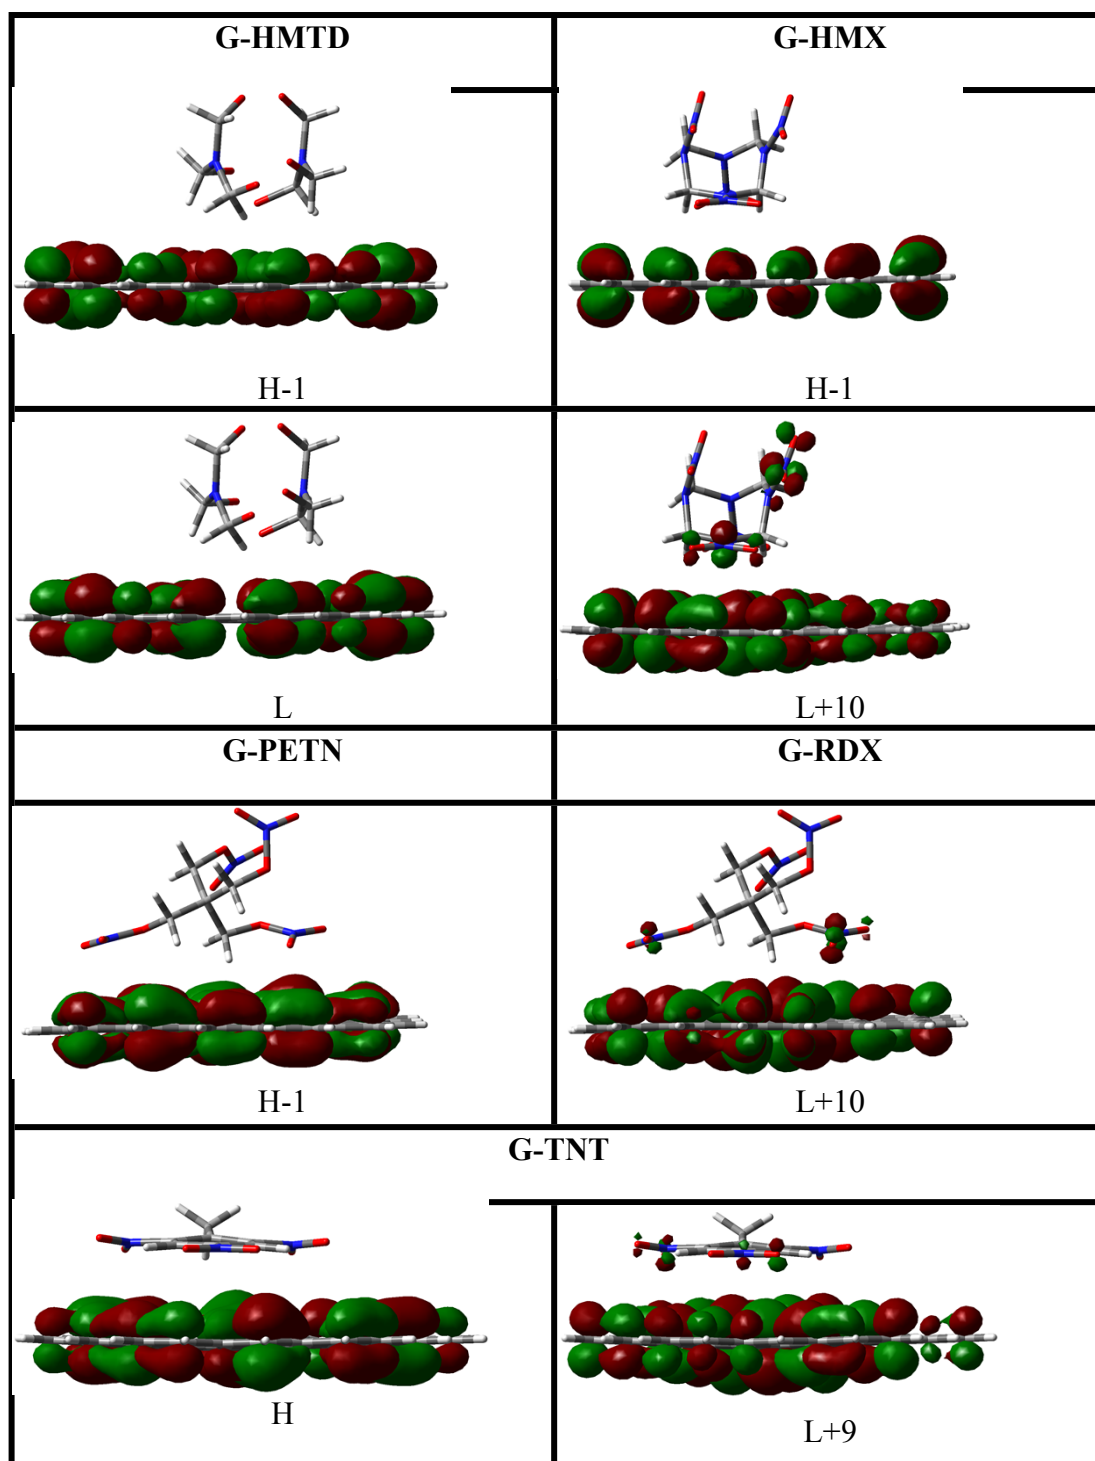

**Figure S3.** Frontier molecular orbitals involved in the vertical excitation of G-explosive complexes.

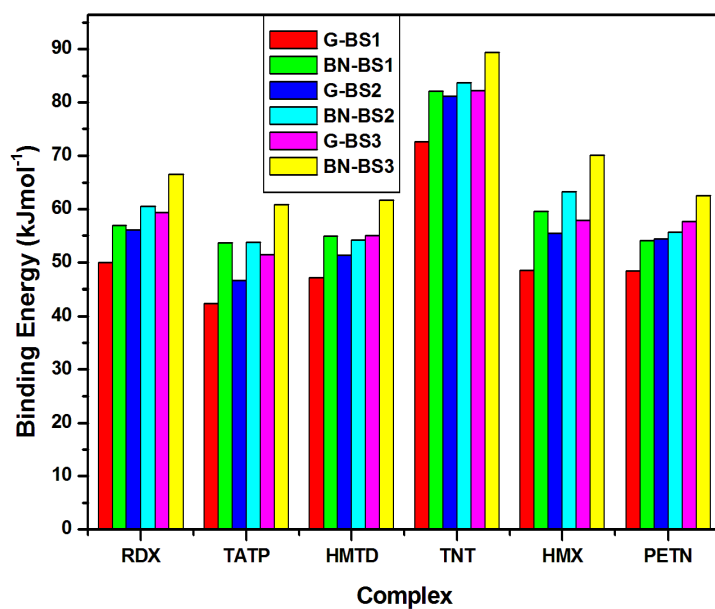

**Figure S4.** Comparison BE of BN and G-explosive complexes with different basis sets using B3LYP-D/BS1 or BS2 or BS3 (BS1:6-311++G(2d,2p), BS2: 6-311G(2df,2pd) and BS3: cc-pVTZ).

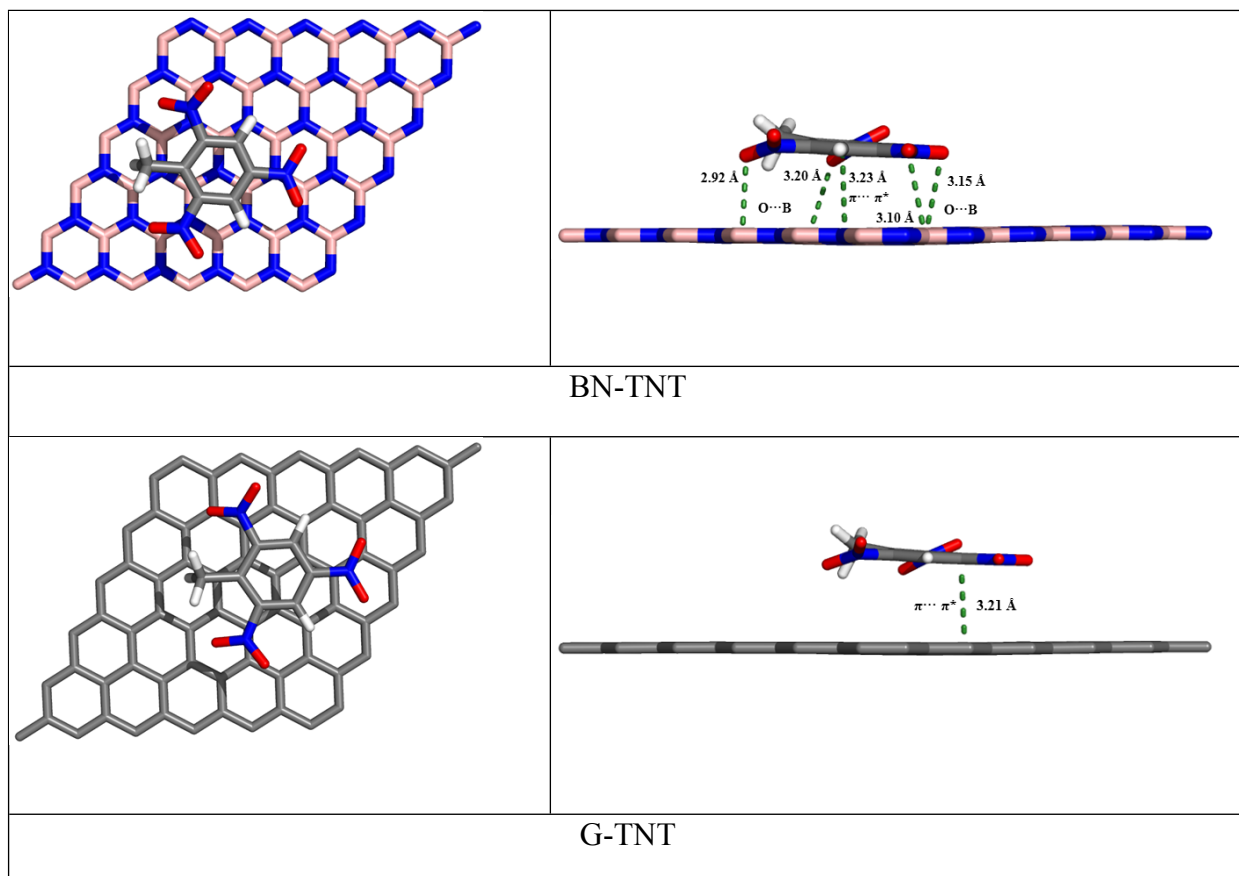

**Figure S5.** Energy minimized structures of complexes of TNT with 2D periodic BN and G sheets.

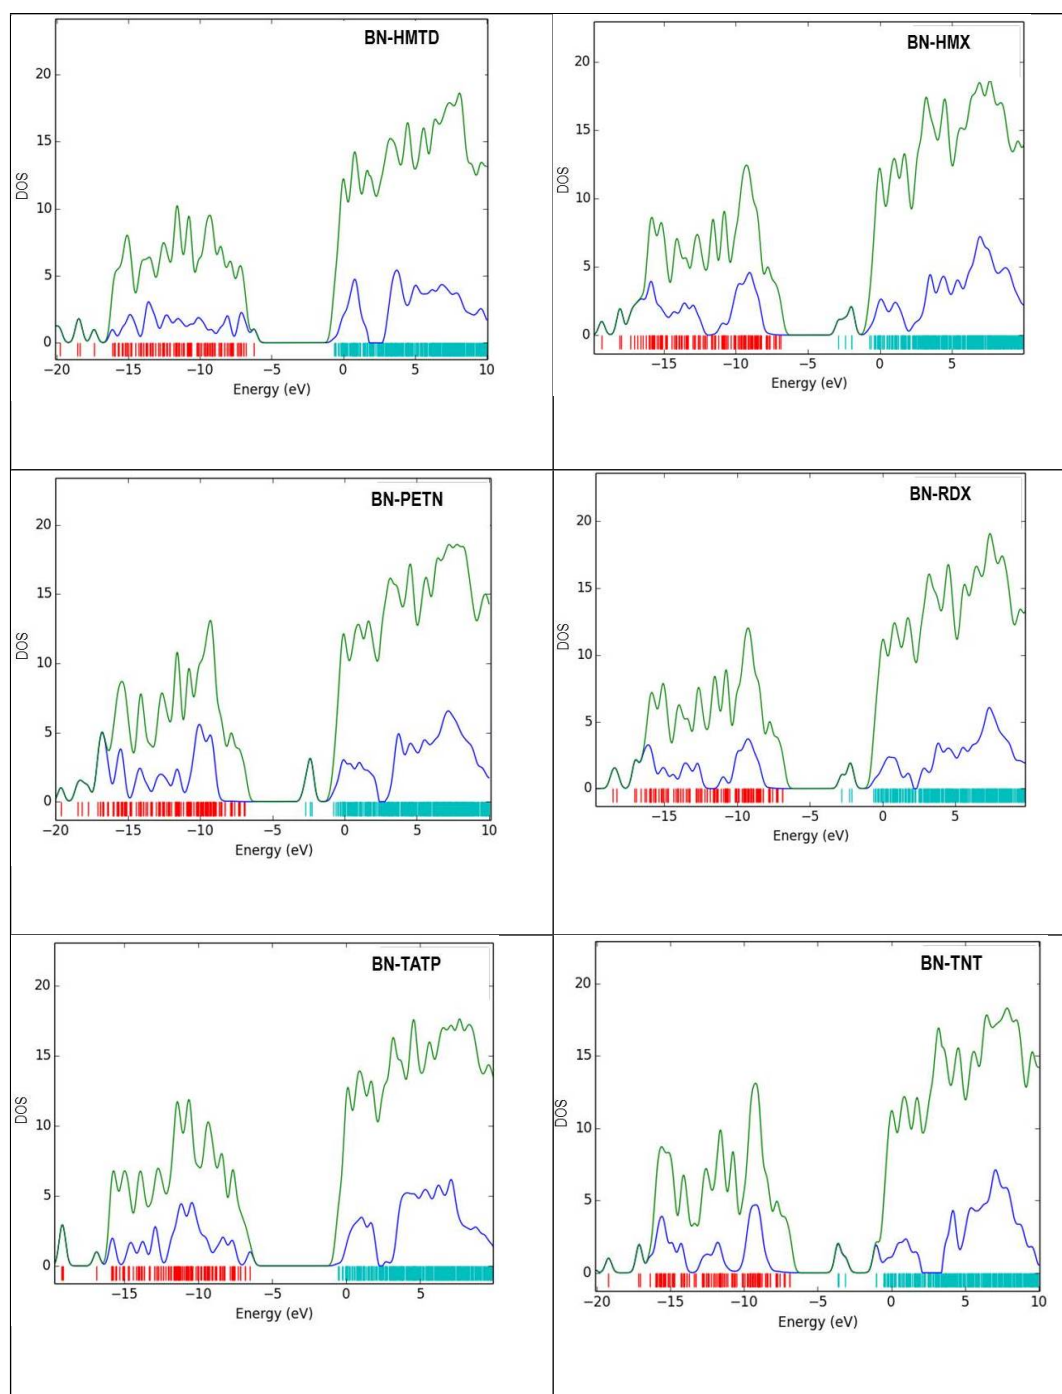

**Figure S6.** Calculated partial density of states (PDOS) of BN-explosive complexes with B3LYP-D/6-31+G(d,p) level of theory. (Green: BN, Blue: explosive molecule, Red: Occupied MO's, Cyan: Unoccupied MO's).

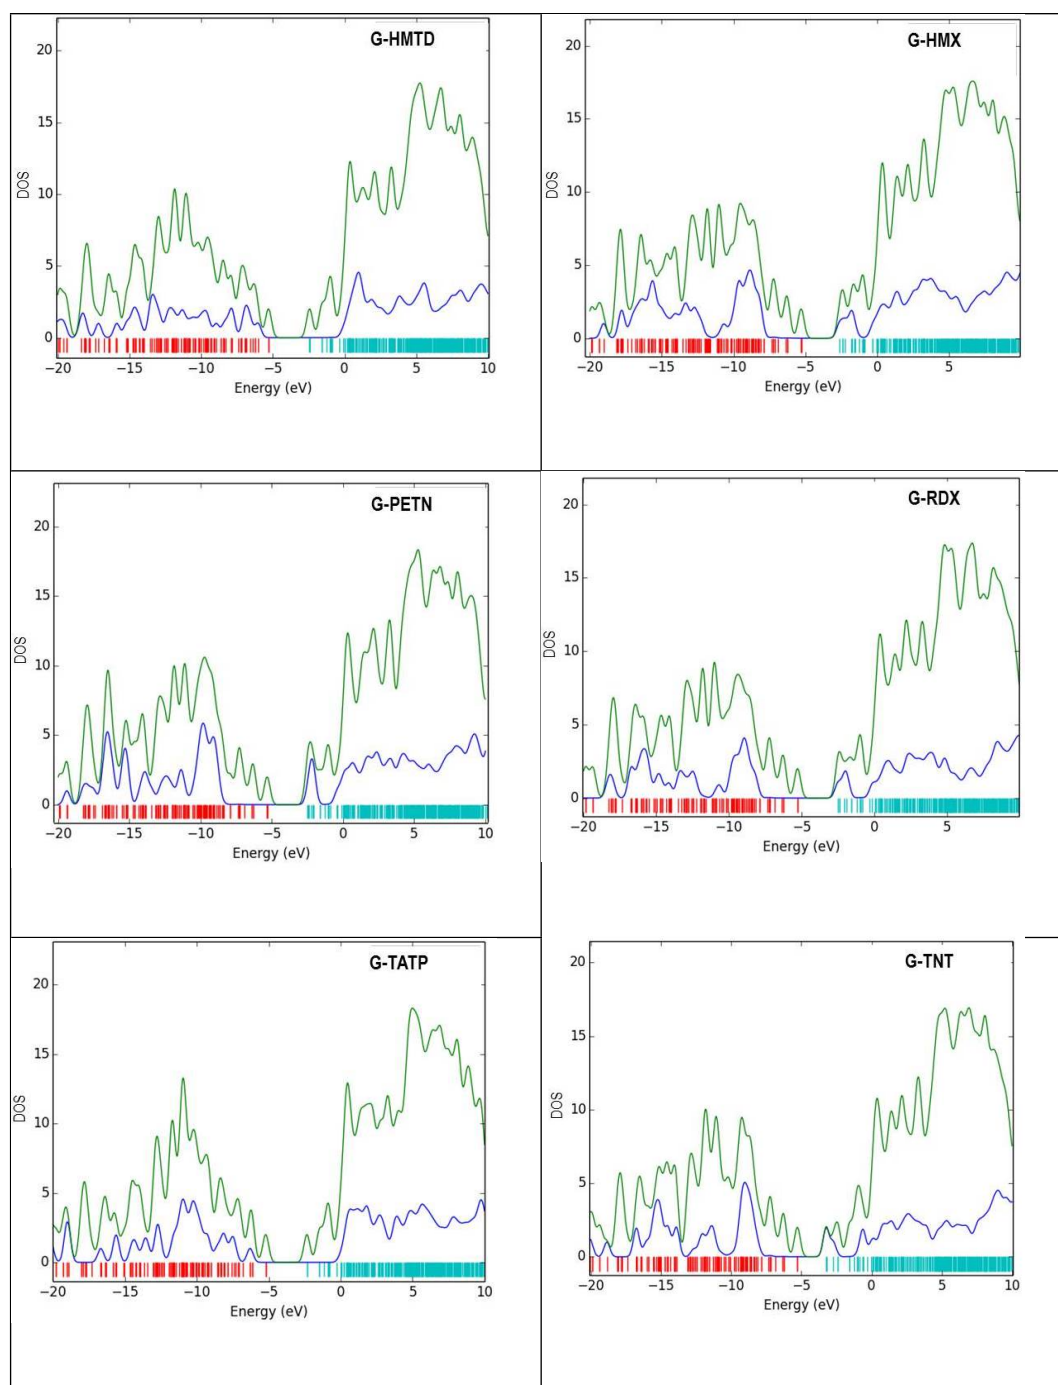

**Figure S7.** Calculated partial density of states (PDOS) of BN-explosive complexes with B3LYP-D/6-31+G(d,p) level of theory (Green: BN, Blue: explosive molecule, Red: Occupied MO's, Cyan: Unoccupied MO's).

| System  | HOMO                                                                                | LUMO                                                                                 |
|---------|-------------------------------------------------------------------------------------|--------------------------------------------------------------------------------------|
| BN-HMTD | 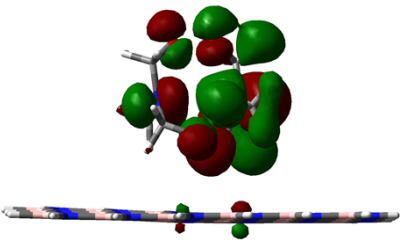   | 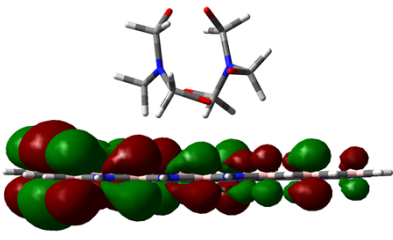   |
| BN-HMX  | 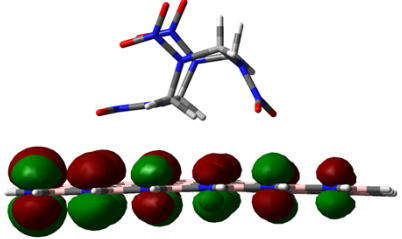   | 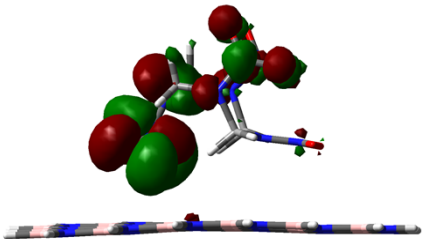   |
| BN-PETN | 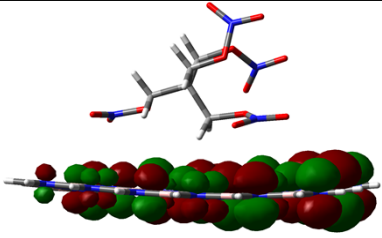  | 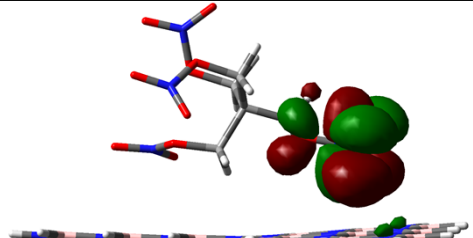  |
| BN-RDX  | 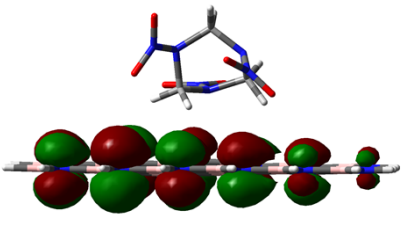 | 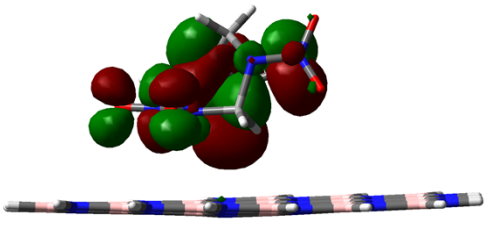 |
| BN-TATP | 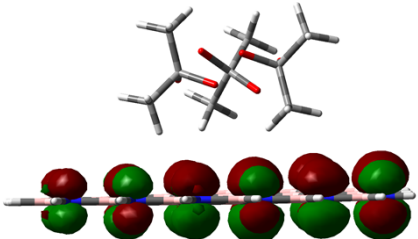 | 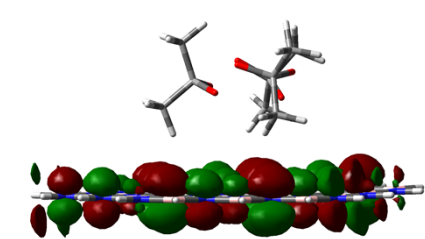 |
| BN-TNT  | 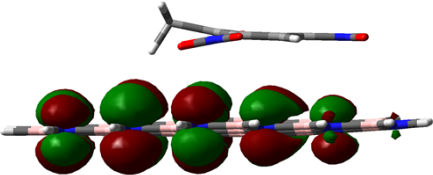 | 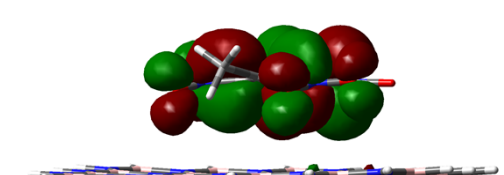 |

**Figure S8.** HOMO and LUMO isosurfaces of BN-explosive complexes at B3LYP-D/6-31+G(d,p) level of theory.

| System | HOMO                                                                                | LUMO                                                                                 |
|--------|-------------------------------------------------------------------------------------|--------------------------------------------------------------------------------------|
| G-HMTD | 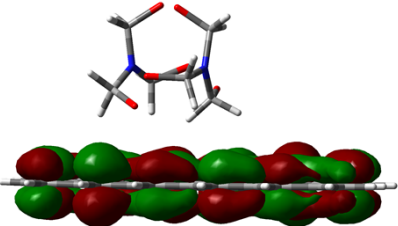   | 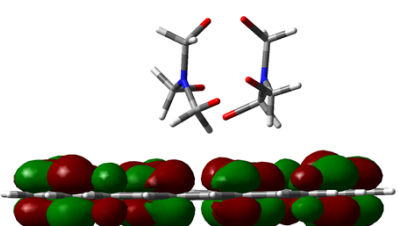   |
| G-HMX  | 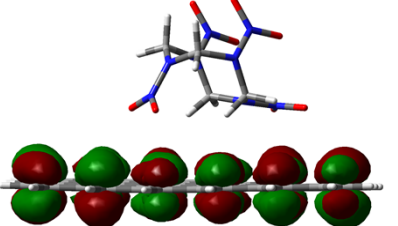   | 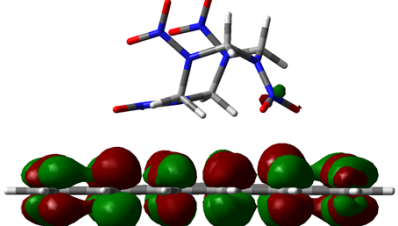  |
| G-PETN | 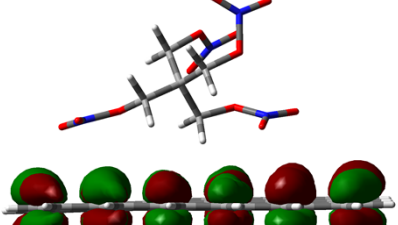  | 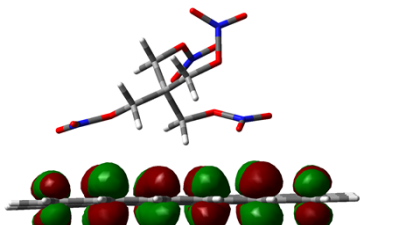  |
| G-RDX  | 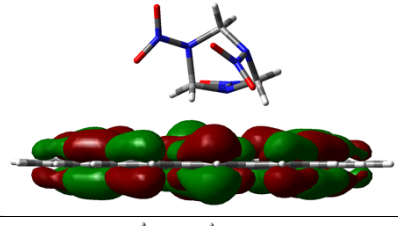 | 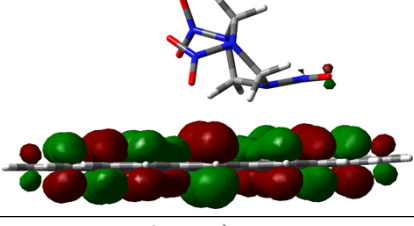 |
| G-TATP | 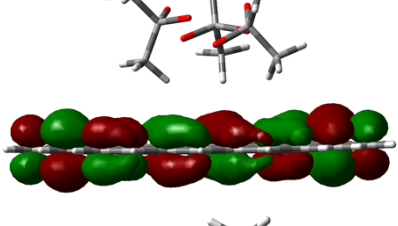 | 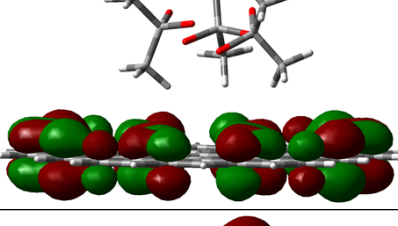 |
| G-TNT  | 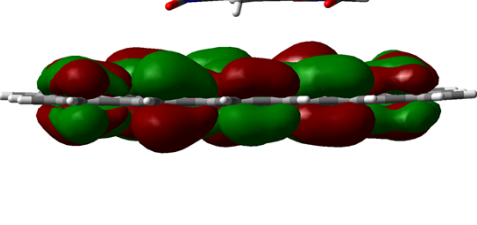 | 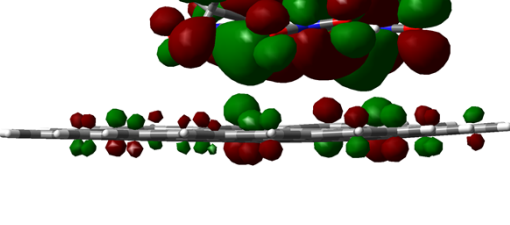 |

**Figure S9.** HOMO and LUMO isosurfaces of G-explosive complexes at B3LYP-D/6-31+G(d,p) level of theory.
